# Supplementary material
Source: Springer Nature journal article supplement (https://www.springermedizin.de/resource/supplementary/12872_2010_328_MOESM4_ESM.pdf/9429710)

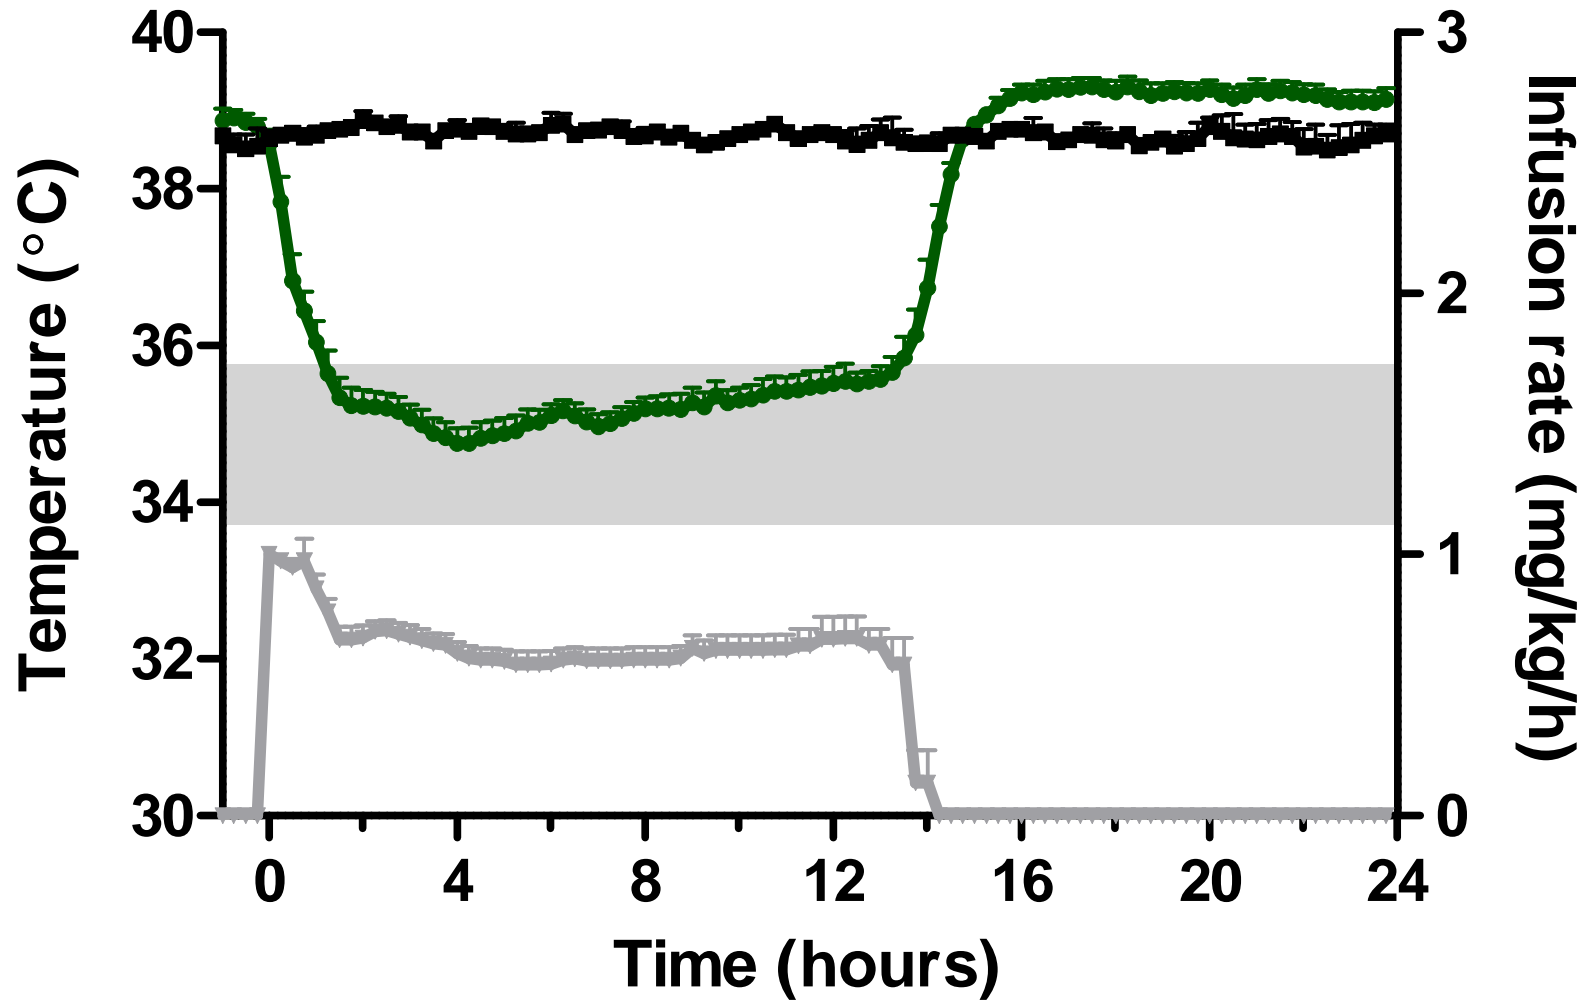

— Control      — DHC (infusion rate)  
— DHC

Supplement: MOESM4 [file 9429710]
